# Supplementary material for: Urokinase-type plasminogen activator receptor interaction with β1 integrin is required for platelet-derived growth factor-AB-induced human mesenchymal stem/stromal cell migration
Source: PubMed Central journal article supplement (PMC4588680; doi:10.1186/s13287-015-0163-5), 2015-09-29
Supplement: 13287_2015_163_MOESM3_ESM.pdf [file 13287_2015_163_MOESM3_ESM.pdf]

**A**

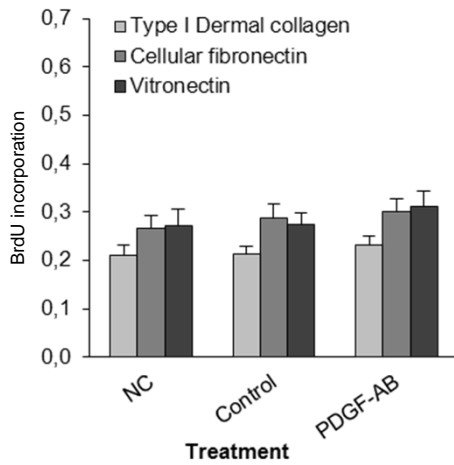

**B**

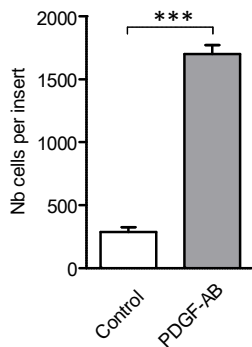

**Figure S2 : PDGF-AB enhances BM-MSCs Migration but not proliferation. (A):** BrdU incorporation in BM-MSCs 22 hours after culture in serum-free control medium or PDGF-AB supplemented medium. BM-MSCs without addition of BrdU were used as negative controls (NC). **(B):** BM-MSCs were seeded in collagen I coated-transwells. After 22h incubation, migrated cells on the lower face of the filters were counted. Data are expressed as mean  $\pm$  SEM of total number of migrated cells per inserts, from three independent experiments (one donor per experiment), each performed in triplicate. \*\*\* $P < 0.001$ . Abbreviations: PDGF-AB, platelet derived growth factor AB, BrdU, bromodeoxyuridine.
