# Supplementary material for: Urokinase-type plasminogen activator receptor interaction with β1 integrin is required for platelet-derived growth factor-AB-induced human mesenchymal stem/stromal cell migration
Source: PubMed Central journal article supplement (PMC4588680; doi:10.1186/s13287-015-0163-5), 2015-09-29
Supplement: 13287_2015_163_MOESM4_ESM.pdf [file 13287_2015_163_MOESM4_ESM.pdf]

**A**

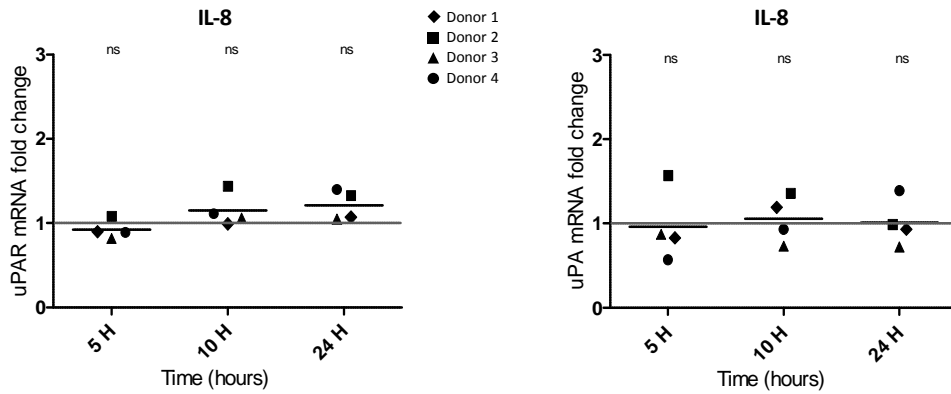

**B**

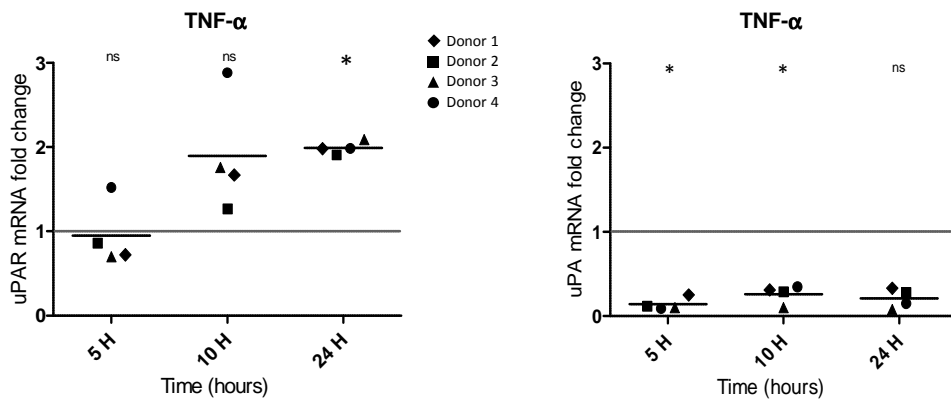

**Figure S3: Regulation of uPAR and uPA expression in BM-MSCs by inflammatory cytokines .** BM-MSCs isolated from four donors were grown in serum-free control medium or treated with IL-8 or TNF- $\alpha$ . **(A):** Quantitative PCR analysis of uPAR (left) and uPA (right) mRNA synthesis 5, 10 or 24 hours after treatment with IL-8. **(B):** Quantitative PCR analysis of uPAR (left) and uPA (right) mRNA synthesis 5, 10 or 24 hours after treatment with TNF- $\alpha$ . Data from four independent donors are presented as mRNA fold change relative to non-stimulated control cells for each donor (1= no stimulation). \* P<0,05.
