# Supplementary material for: Urokinase-type plasminogen activator receptor interaction with β1 integrin is required for platelet-derived growth factor-AB-induced human mesenchymal stem/stromal cell migration
Source: PubMed Central journal article supplement (PMC4588680; doi:10.1186/s13287-015-0163-5), 2015-09-29
Supplement: 13287_2015_163_MOESM9_ESM.pdf [file 13287_2015_163_MOESM9_ESM.pdf]

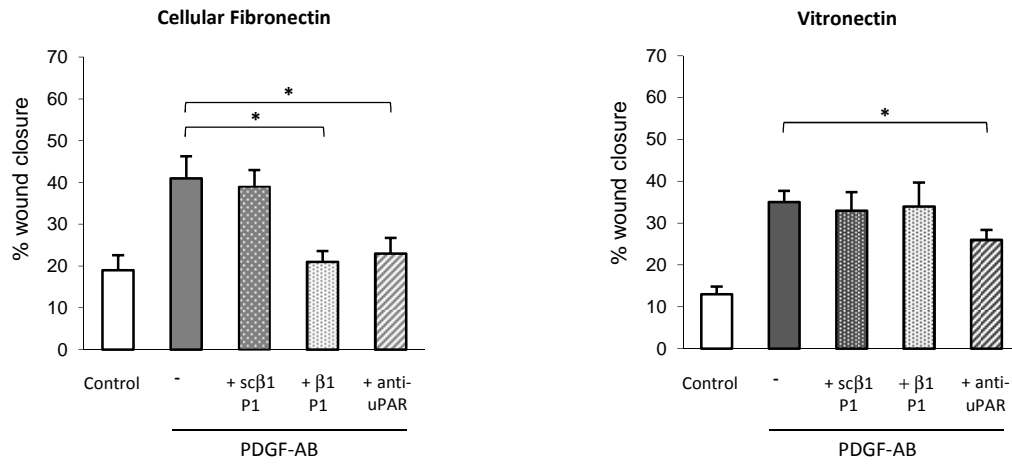

**Figure S8 :  $\beta$ 1 integrin and BM-MSC migration.** Scratch test assay was performed on BM-MSC isolated from three donors and seeded in plates coated with type cellular fibronectin or vitronectin. Two hours after adherence, cells were cultured in serum-free control medium or treated with PDGF-AB, in presence or not (-) of integrin blocking peptide  $\beta$ 1P1 along with the corresponding scrambled control sc $\beta$ 1P1 or anti-uPAR neutralizing antibody. Results are expressed as percentages of wound closure at T=22 h compared to T=0. Mean of three independent experiments  $\pm$  SEM are represented (one donor per experiment), each performed in triplicate. \* P<0,05.
